# Supplementary material for: Potassium and Magnesium in American Ginseng Roots as Key Factors in Monitoring Soil Quality, Yield, and Quality: Screening, Prediction, and Validation
Source: MDPI journal article supplement (doi:10.3390/horticulturae10040344), 2024-03-29
Supplement: s1 [file s1]

Table S1 The sampling information

| N0. | Name   | Longitude(E) | Latitude(N) | Elevation | Sampling time   | Sampling location                 |
|-----|--------|--------------|-------------|-----------|-----------------|-----------------------------------|
| 1   | JL-1-1 | 126° 22' 59" | 42° 18' 50" | 681       | 1 October 2019  | Huinan County, Tonghua City       |
| 2   | JL-1-2 | 126° 22' 55" | 42° 18' 20" | 681       |                 |                                   |
| 3   | JL-1-3 | 126° 22' 59" | 42° 18' 2"  | 681       |                 |                                   |
| 4   | JL-1-4 | 126° 25' 24" | 42° 19' 6"  | 683       |                 |                                   |
| 5   | JL-1-5 | 126° 25' 14" | 42° 19' 8"  | 683       |                 |                                   |
| 6   | JL-1-6 | 126° 25' 6"  | 42° 19' 2"  | 683       |                 |                                   |
| 7   | JL-1-7 | 126° 22' 18" | 42° 20' 48" | 685       |                 |                                   |
| 8   | JL-1-8 | 126° 22' 34" | 42° 21' 11" | 685       |                 |                                   |
| 9   | JL-1-9 | 126° 21' 7"  | 42° 21' 42" | 685       |                 |                                   |
| 10  | SD-1-1 | 120° 50' 7"  | 37° 2' 2"   | 82        | 16 October 2019 | Wendeng District, Weihai City     |
| 11  | SD-1-2 | 120° 50' 28" | 37° 2' 28"  | 82        |                 |                                   |
| 12  | SD-1-3 | 120° 50' 9"  | 37° 2' 13"  | 82        |                 |                                   |
| 13  | SD-1-4 | 121° 59' 24" | 37° 21' 27" | 41        |                 |                                   |
| 14  | SD-1-5 | 121° 59' 23" | 37° 21' 14" | 41        |                 |                                   |
| 15  | SD-1-6 | 121° 59' 22" | 37° 21' 37" | 41        |                 |                                   |
| 16  | SD-1-7 | 122° 14' 3"  | 37° 13' 45" | 30        |                 |                                   |
| 17  | SD-1-8 | 122° 14' 9"  | 37° 13' 48" | 30        |                 |                                   |
| 18  | SD-1-9 | 122° 14' 6"  | 37° 13' 56" | 30        |                 |                                   |
| 19  | SX-1-1 | 106° 43' 55" | 37° 13' 56" | 1086      | 8 October 2019  | Liuba county in Hanzhong, Shaanxi |
| 20  | SX-1-2 | 106° 44' 46" | 33° 38' 44" | 1086      |                 |                                   |
| 21  | SX-1-3 | 106° 43' 40" | 33° 38' 35" | 1086      |                 |                                   |
| 22  | SX-1-4 | 106° 43' 2"  | 33° 36' 44" | 1091      |                 |                                   |
| 23  | SX-1-5 | 106° 42' 36" | 33° 36' 14" | 1091      |                 |                                   |
| 24  | SX-1-6 | 106° 43' 8"  | 33° 36' 23" | 1091      |                 |                                   |
| 25  | SX-1-7 | 106° 45' 44" | 33° 37' 50" | 1089      |                 |                                   |
| 26  | SX-1-8 | 106° 46' 11" | 33° 37' 46" | 1089      |                 |                                   |
| 27  | SX-1-9 | 106° 46' 11" | 33° 37' 33" | 1089      |                 |                                   |
| 28  | SC-1-1 | 106° 8' 9"   | 27° 48' 39" | 1135      | 8 December 2019 | Gulin County, Luzhou City         |
| 29  | SC-1-2 | 106° 8' 6"   | 27° 48' 43" | 1135      |                 |                                   |
| 30  | SC-1-3 | 106° 8' 1"   | 27° 48' 36" | 1135      |                 |                                   |
| 31  | SC-1-4 | 106° 8' 3"   | 27° 48' 45" | 1133      |                 |                                   |
| 32  | SC-1-5 | 106° 8' 12"  | 27° 48' 44" | 1133      |                 |                                   |
| 33  | SC-1-6 | 106° 8' 18"  | 27° 48' 48" | 1133      |                 |                                   |
| 34  | SC-1-7 | 106° 8' 48"  | 27° 49' 3"  | 1134      |                 |                                   |
| 35  | SC-1-8 | 106° 8' 44"  | 27° 49' 3"  | 1134      |                 |                                   |
| 36  | SC-1-9 | 106° 8' 48"  | 27° 49' 6"  | 1134      |                 |                                   |

Table S2 Soil background values for validation trial

| pH          | SOM(g/kg)    | AN(mg/kg)    | AP(mg/kg)    | AK(mg/kg)     | AMg(mg/kg)    | p(g/cm <sup>3</sup> ) |
|-------------|--------------|--------------|--------------|---------------|---------------|-----------------------|
| 6.14 ± 0.07 | 57.92 ± 1.02 | 99.67 ± 2.03 | 62.67 ± 7.11 | 208.47 ± 7.33 | 188.22 ± 3.51 | 1.25 ± 0.03           |

Table S3 Correlation coefficients between maximum Norm and other indicators in each group

| Soil factors | Group | Indicators of maximum Norm value in each group |          |     |     |
|--------------|-------|------------------------------------------------|----------|-----|-----|
|              |       | SOM                                            | AK       | AMg | ACa |
| SOM          | 1     | 1                                              |          |     |     |
| TK           | 1     | 0.986**                                        |          |     |     |
| AP           | 1     | -0.936**                                       |          |     |     |
| TCa          | 1     | 0.923**                                        |          |     |     |
| TCu          | 1     | 0.87**                                         |          |     |     |
| AN           | 1     | 0.892**                                        |          |     |     |
| TN           | 1     | 0.806**                                        |          |     |     |
| TZn          | 2     |                                                | -0.698** |     |     |
| TMn          | 2     |                                                | -0.763** |     |     |
| AK           | 2     |                                                | 1        |     |     |
| TP           | 2     |                                                | -0.291** |     |     |
| AMg          | 3     |                                                |          | 1   |     |
| ACa          | 4     |                                                |          |     | 1   |

Note: \* correlation is significant at  $p < 0.05$ , \*\* correlation is significant at  $p < 0.01$ .

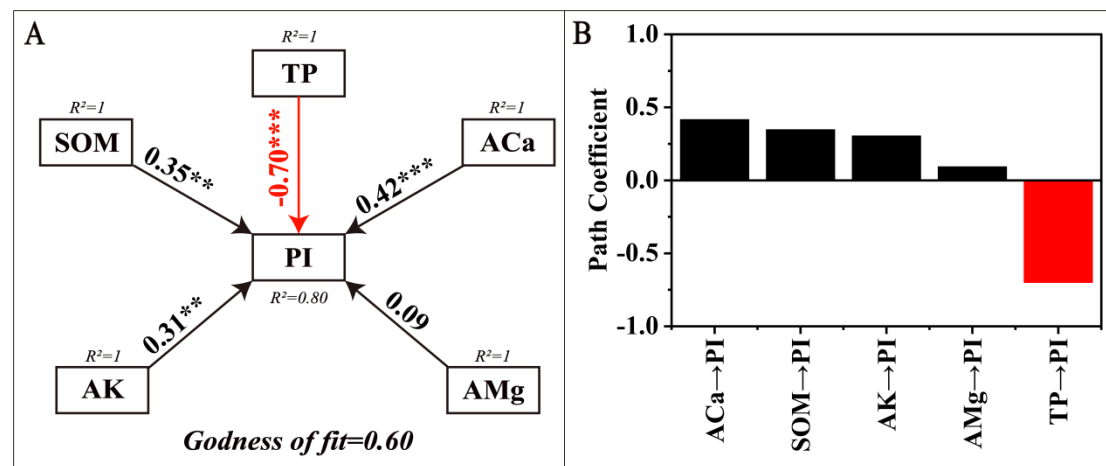

Figure S1. Determine the type of each indicator in MDS. (A)PLS-PM analysis among the five indicators in the MDS and the productivity index (DW and AQI). (B)path coefficient.

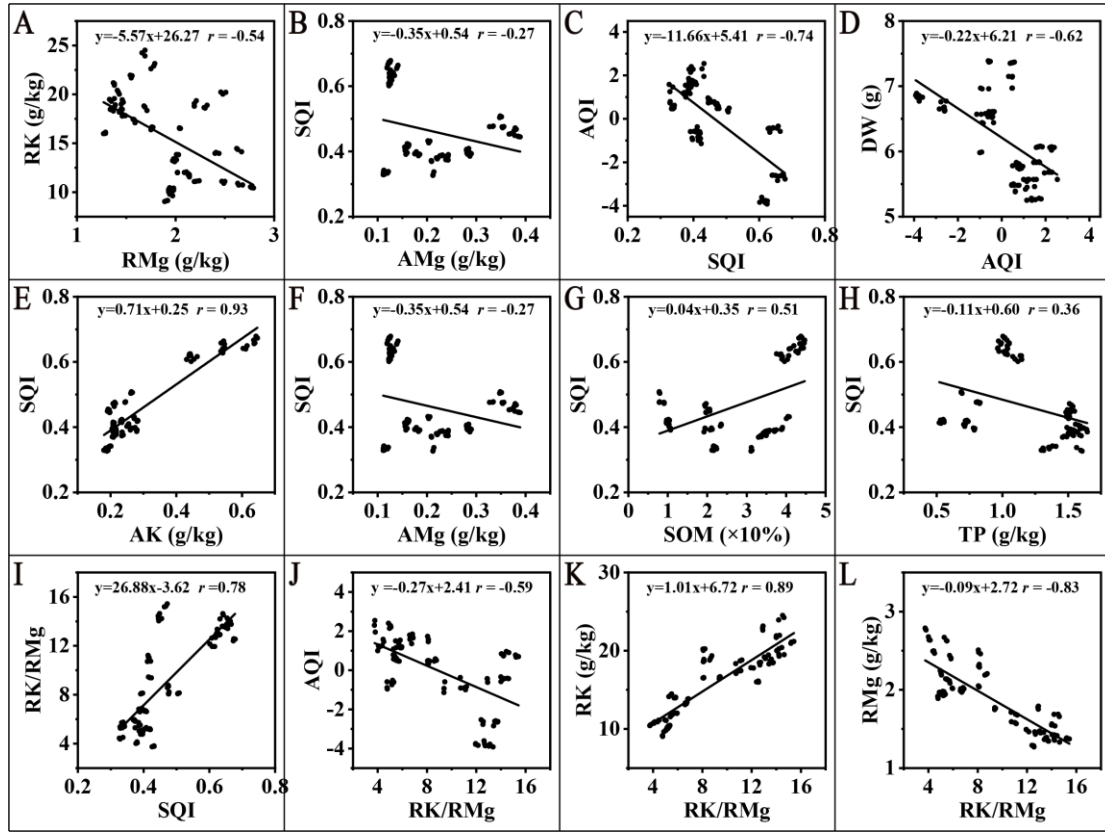

Figure S2 Linear fitting curve.
